# Supplementary material for: Unmasking BCL-2 Addiction in Synovial Sarcoma by Overcoming Low NOXA
Source: MDPI journal article supplement (doi:10.3390/cancers13102310), 2021-05-12

Figure 1C

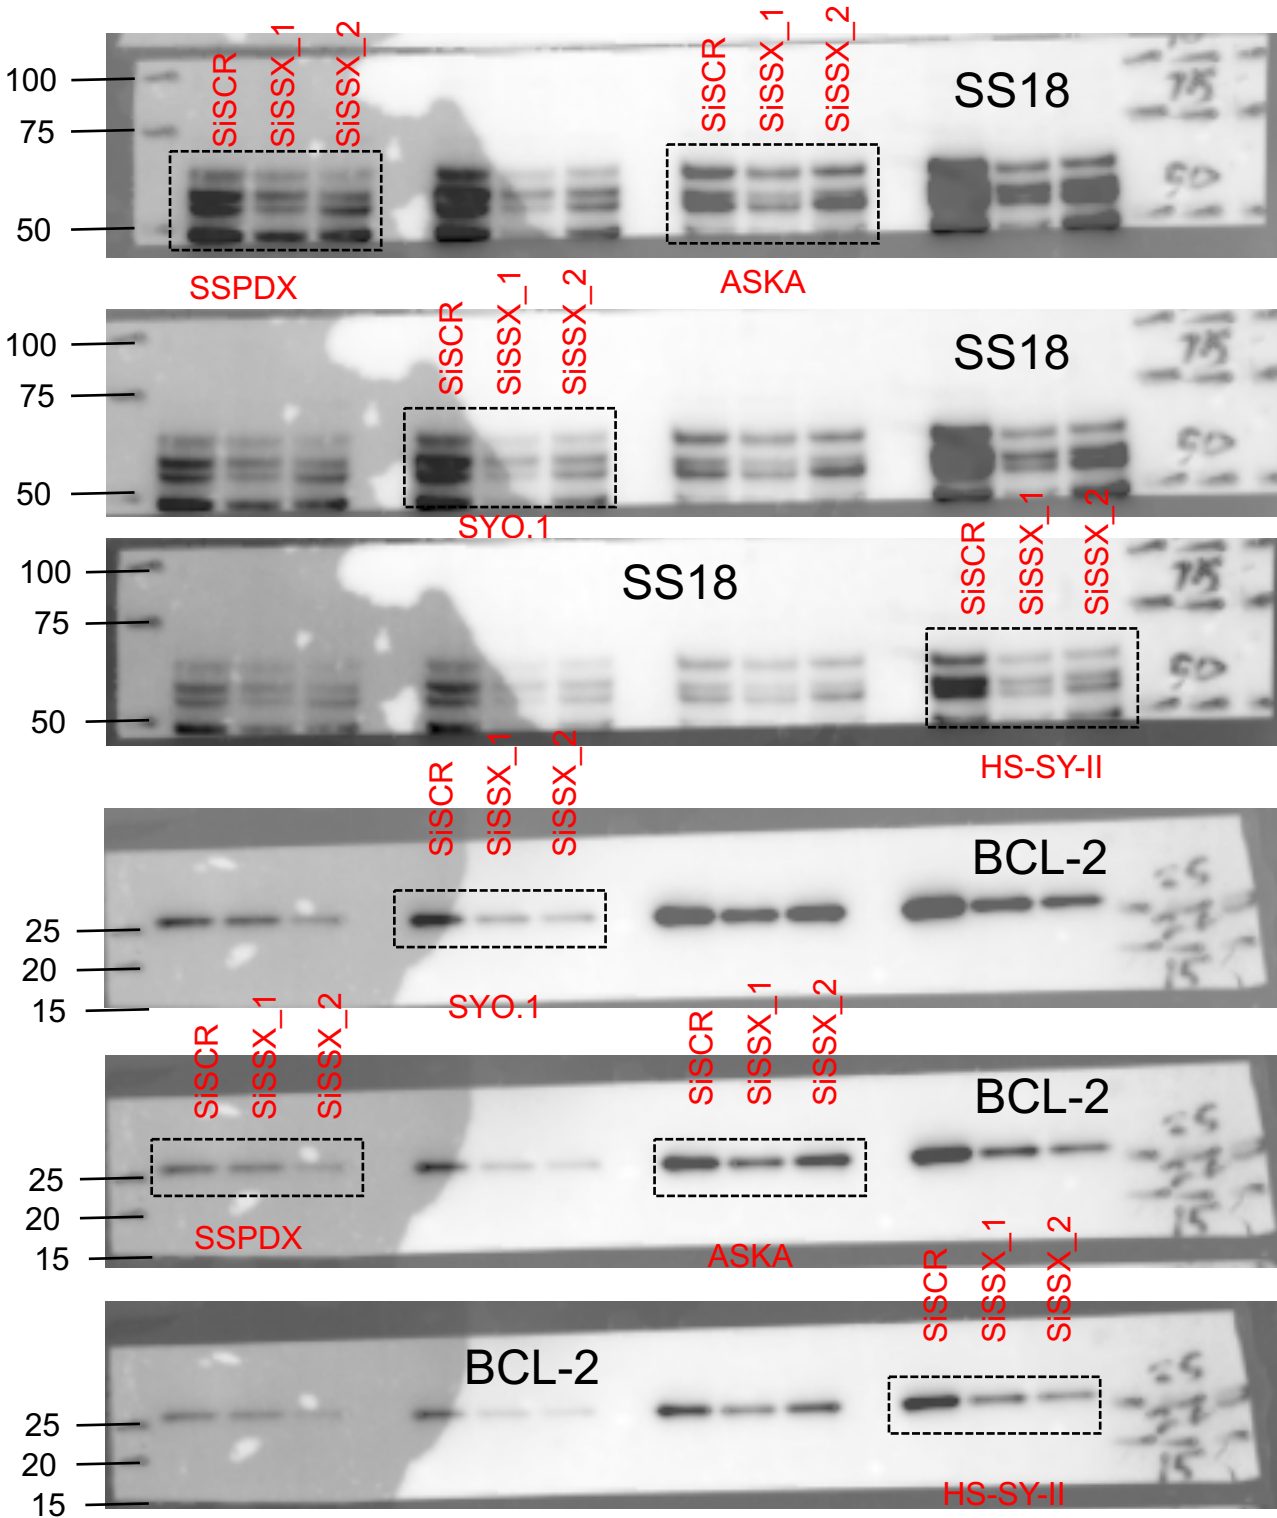

Figure 1C

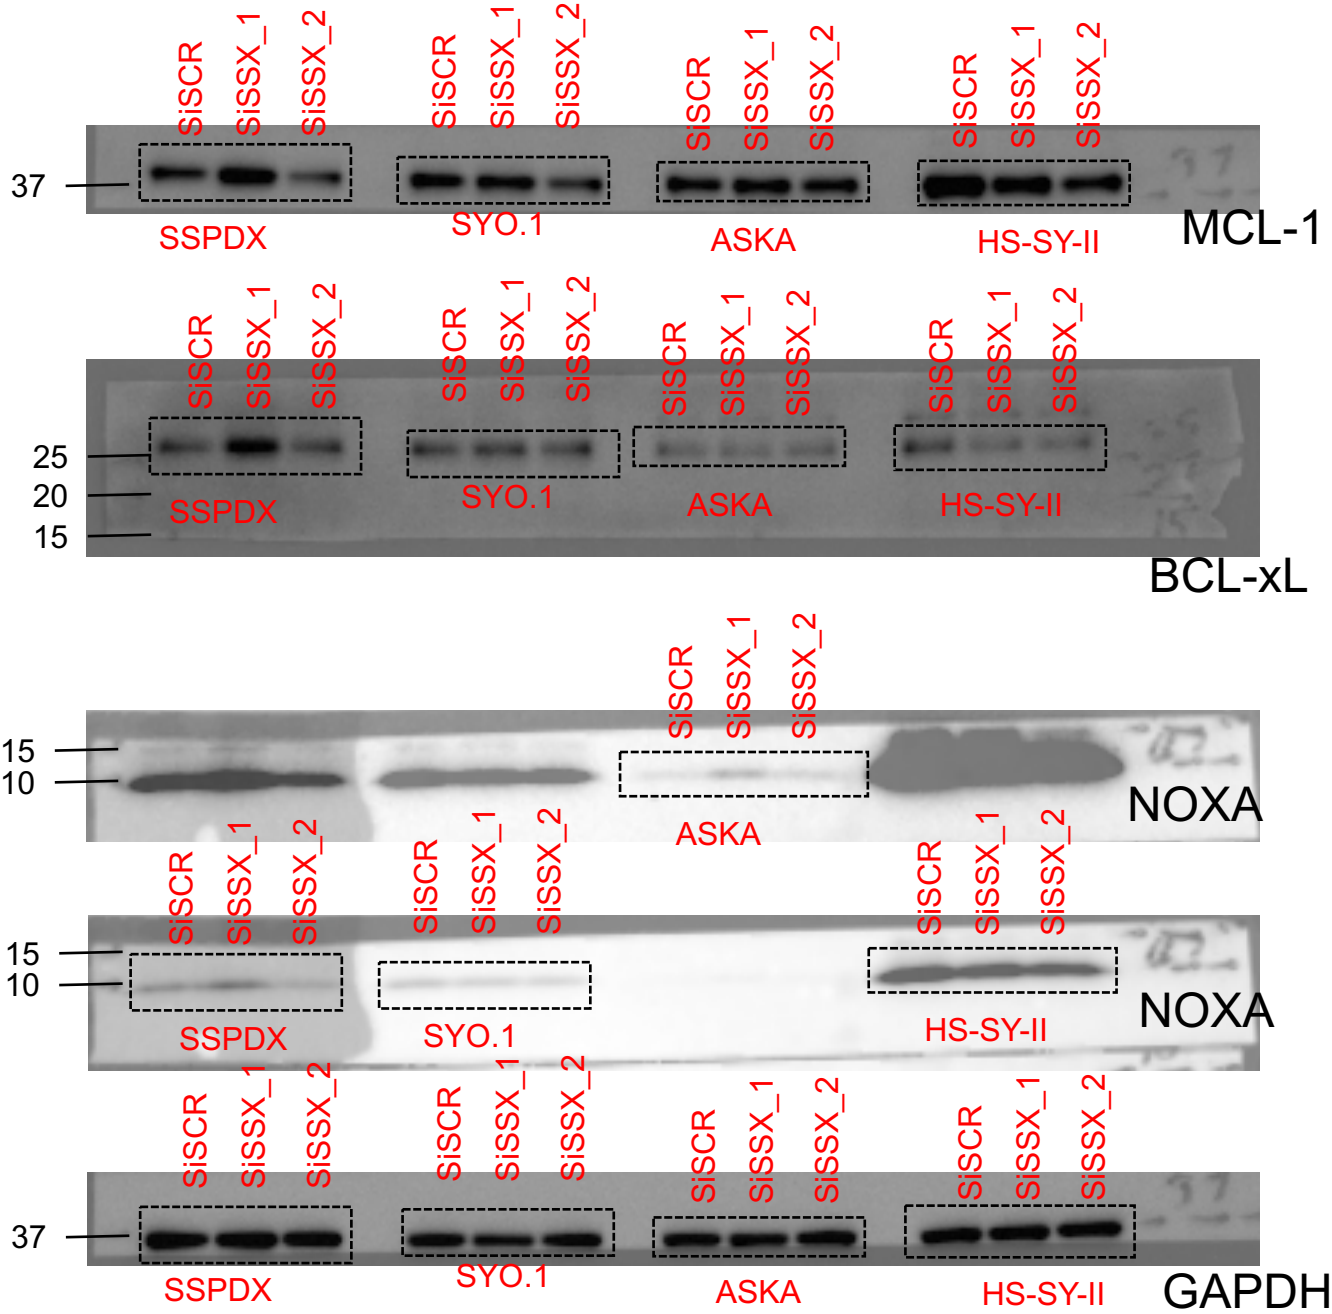

Figure 2A

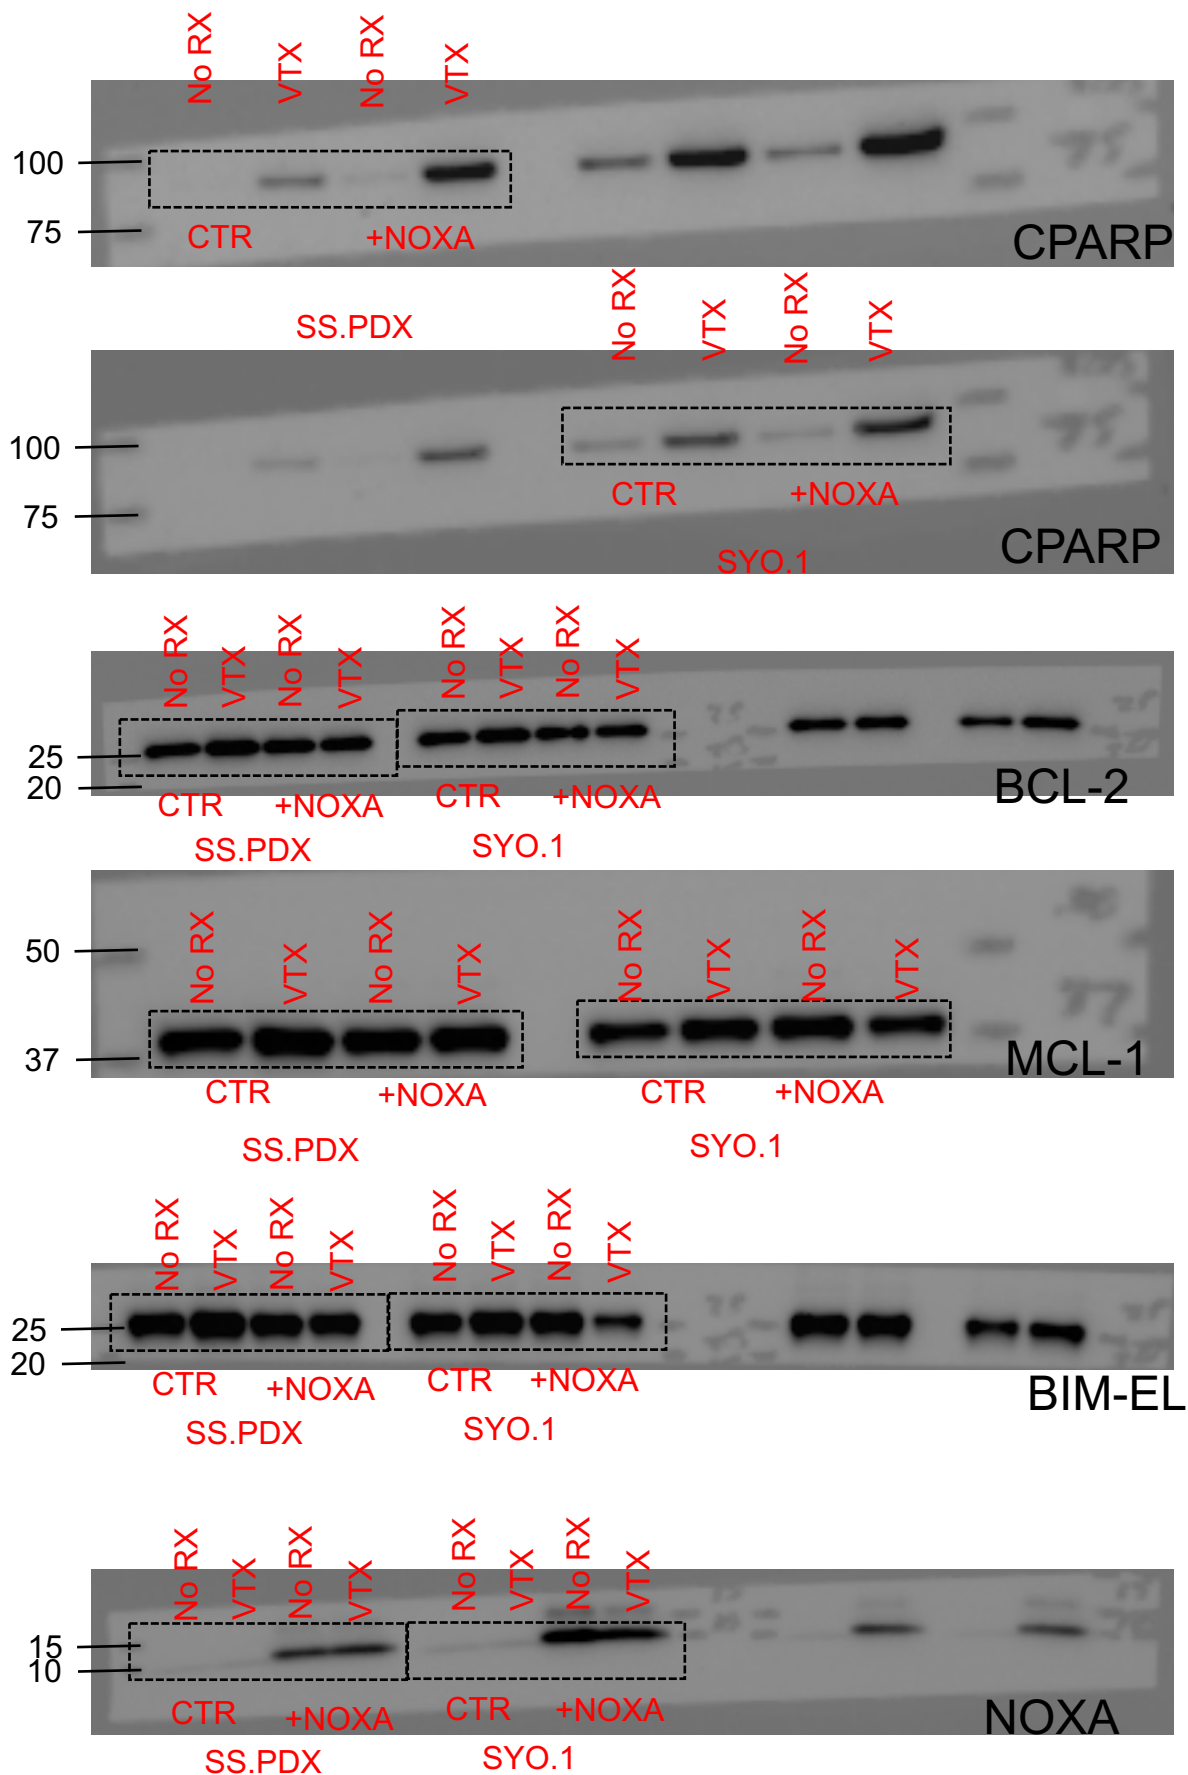

Figure 2A

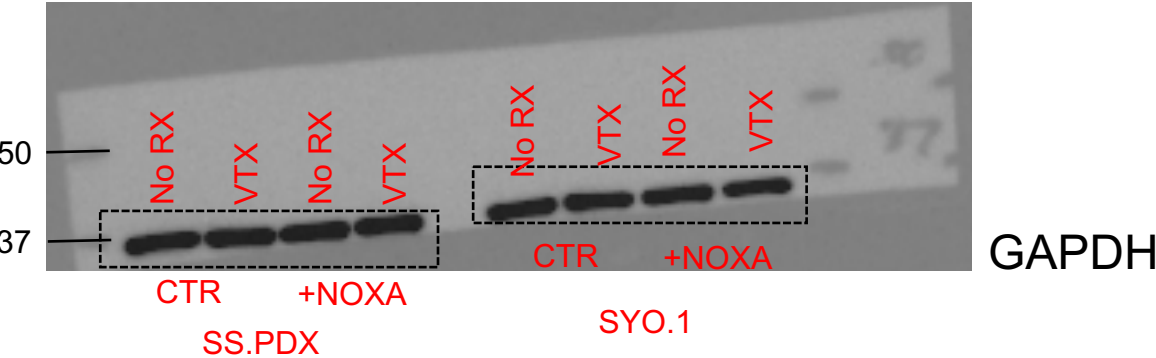



Figure 4A

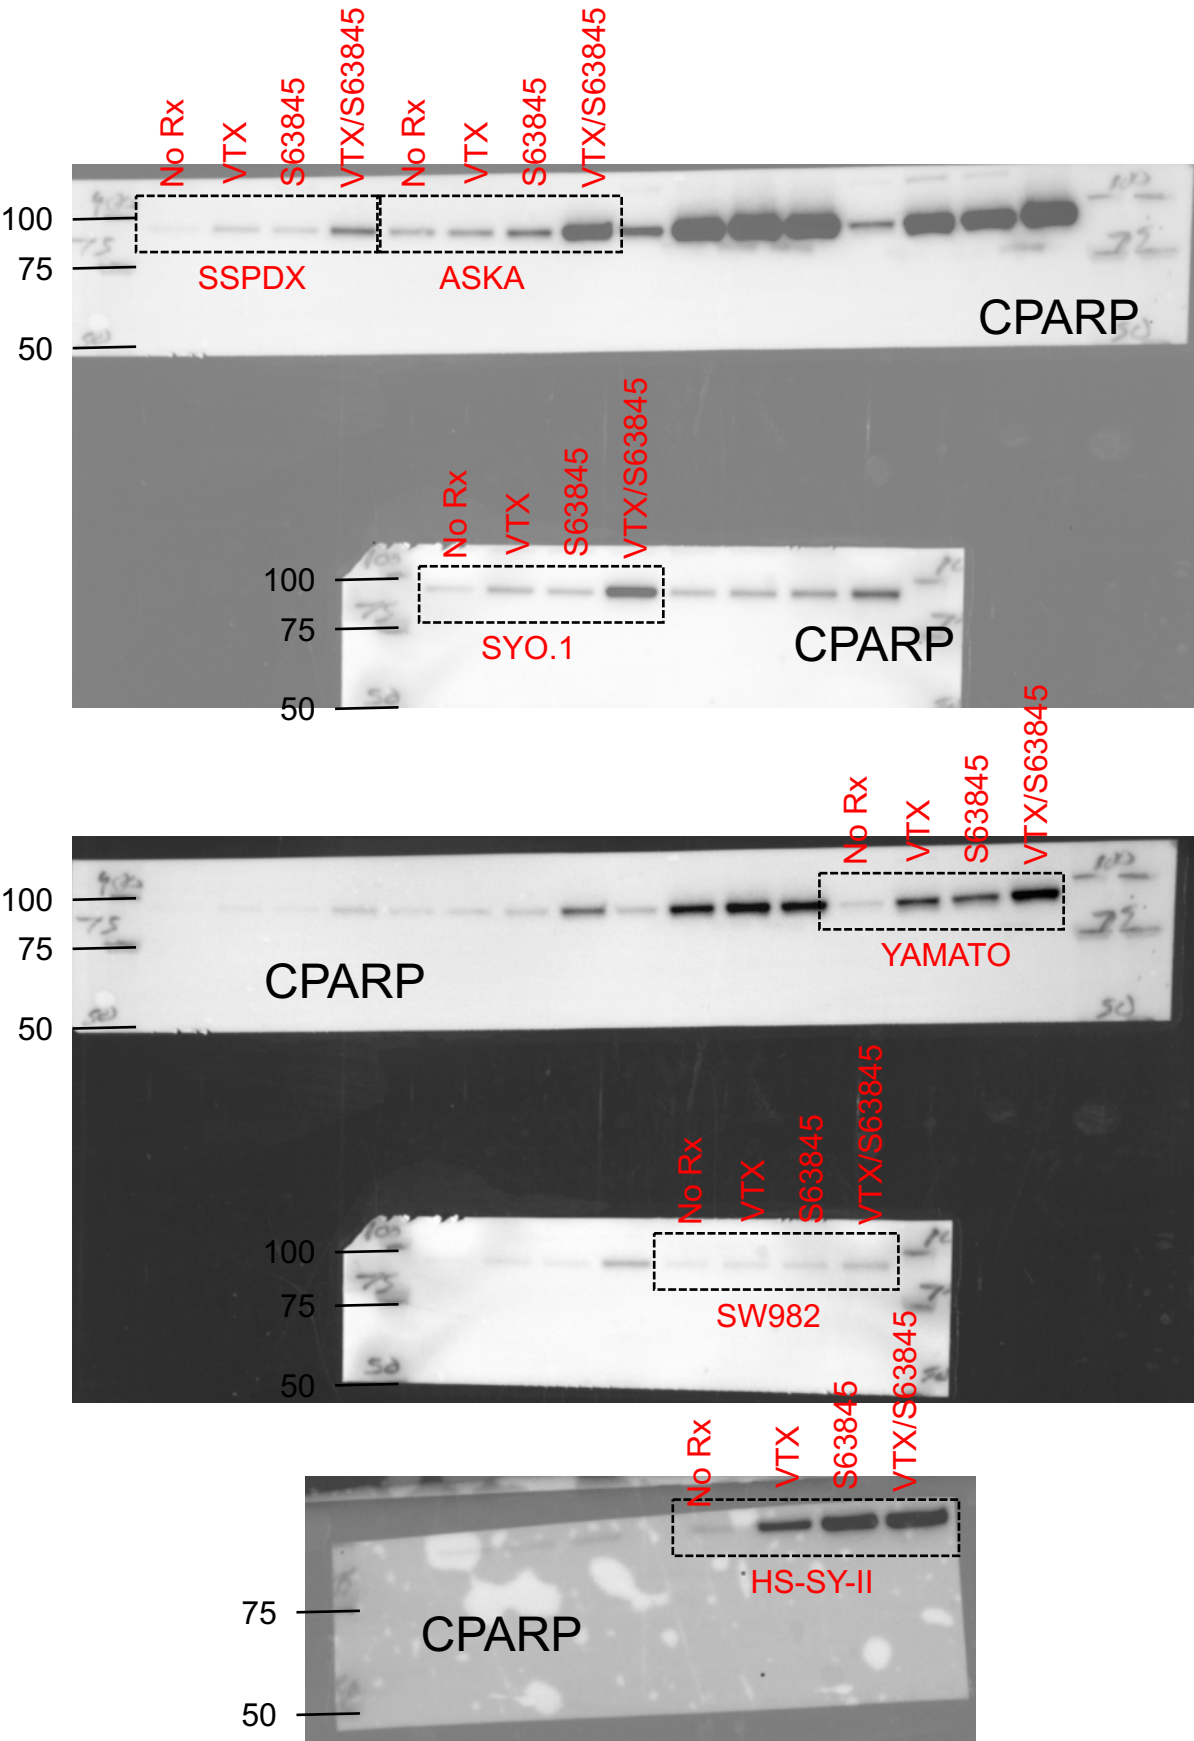

Figure 4A

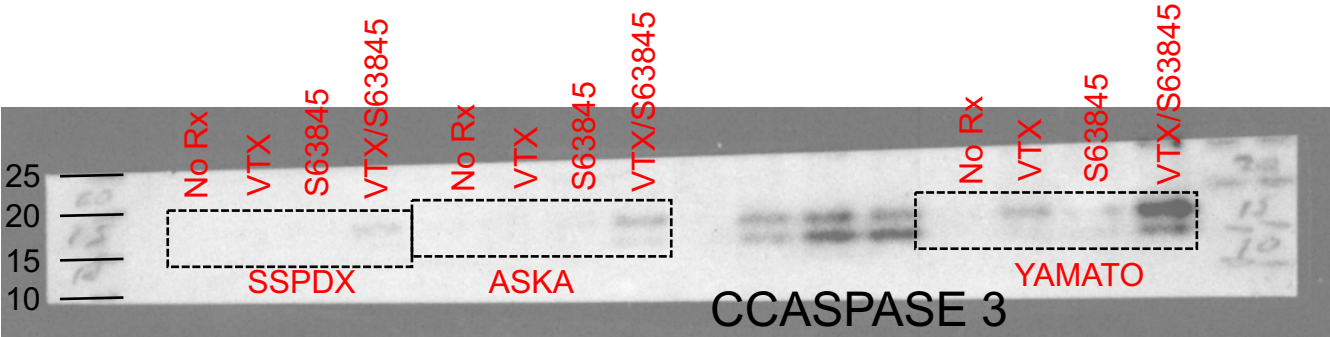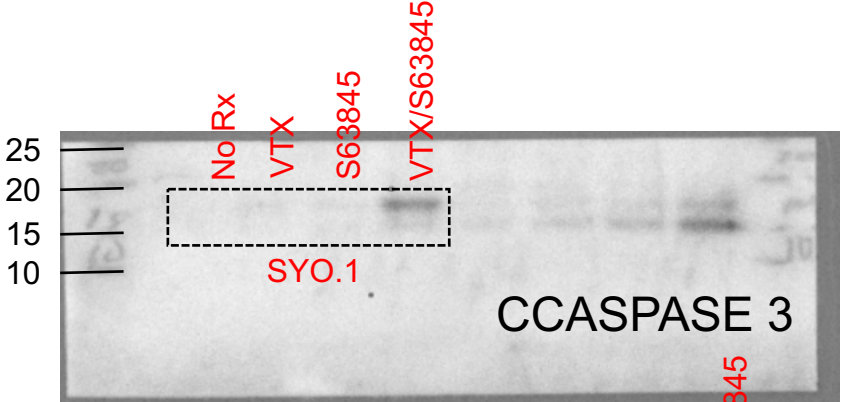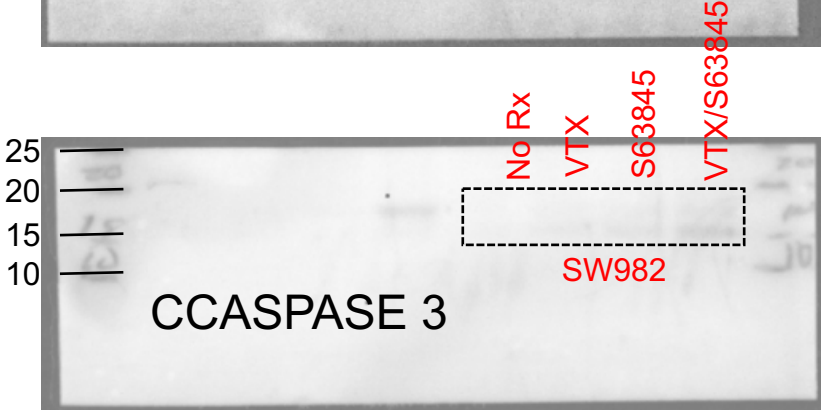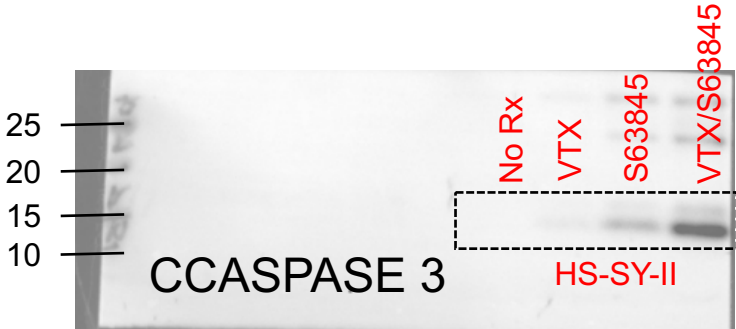

Figure 4A

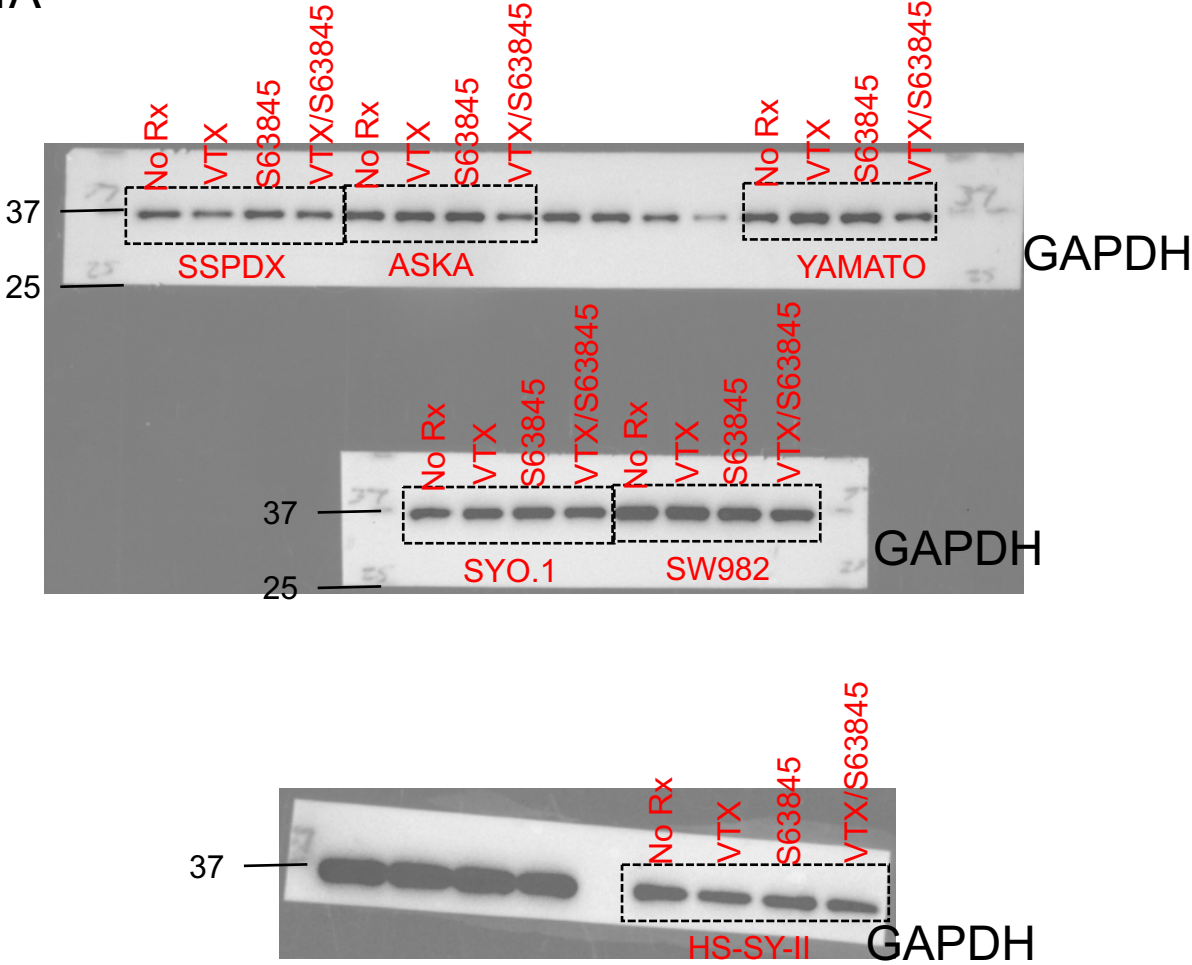

Figure 4C

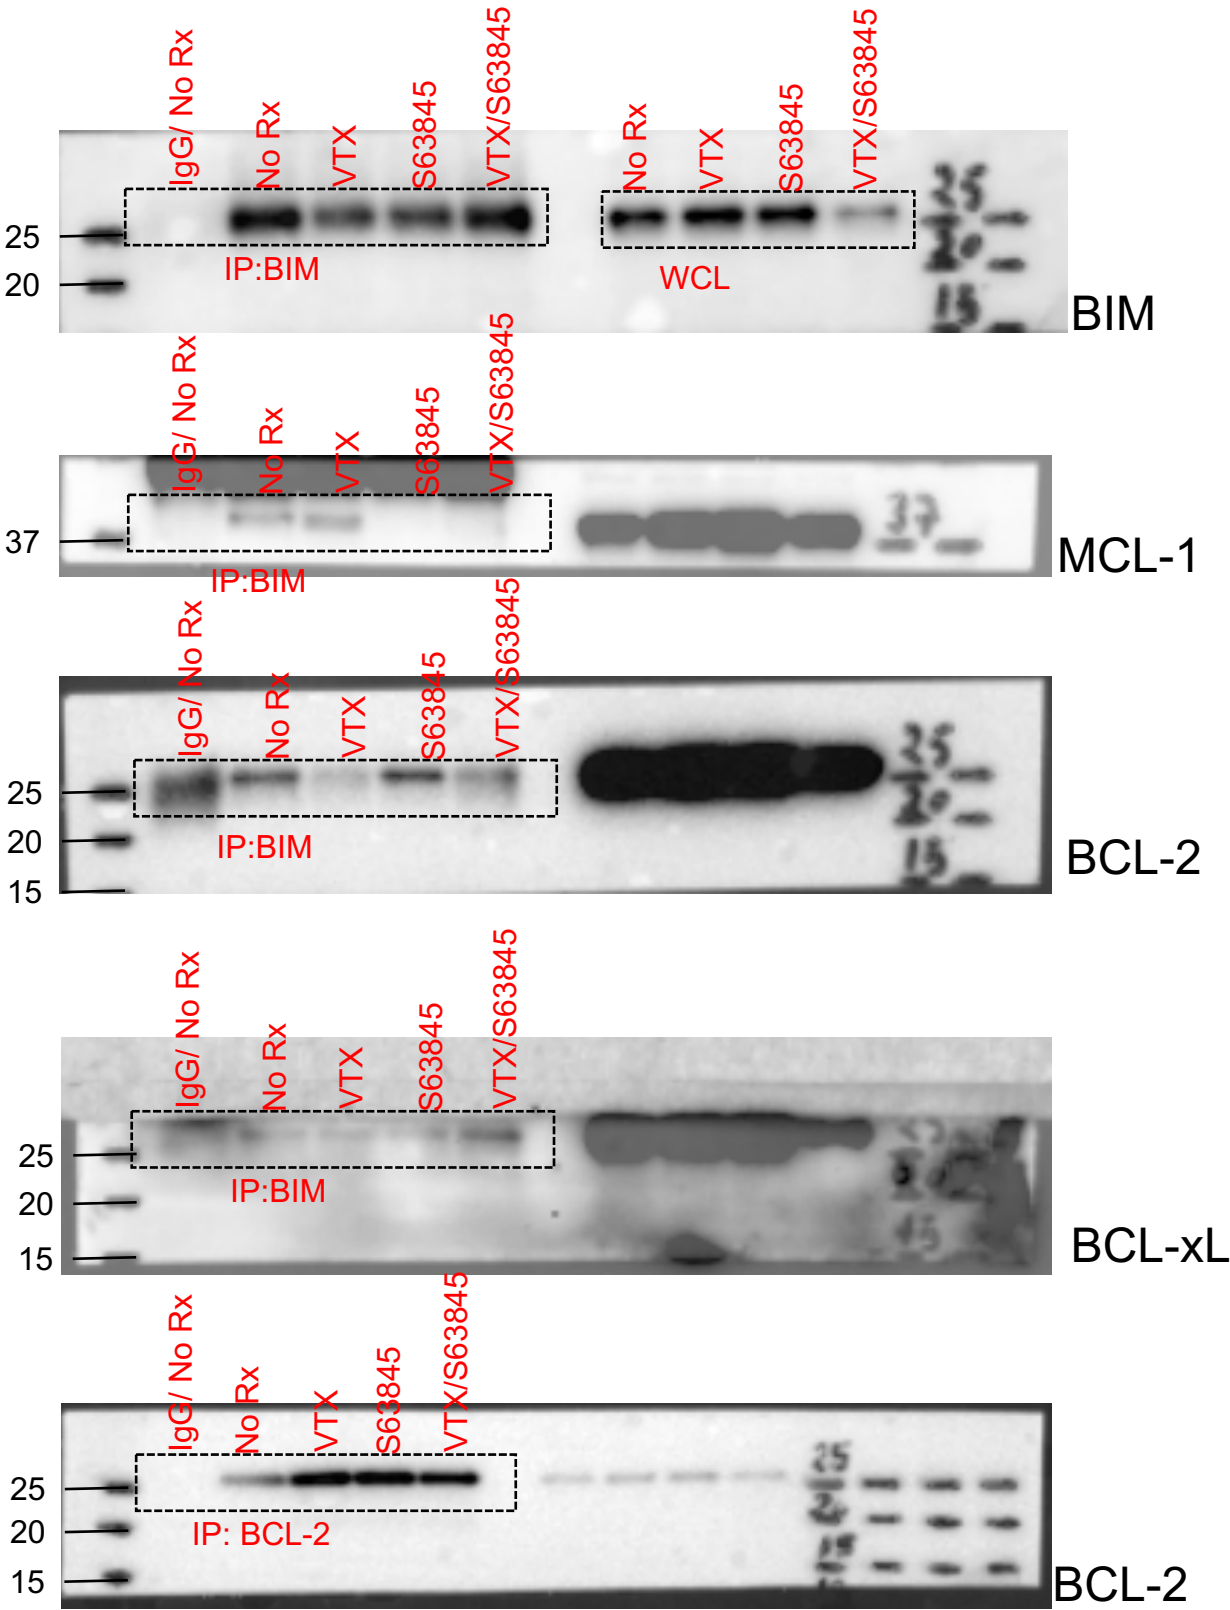

### Figure 4C

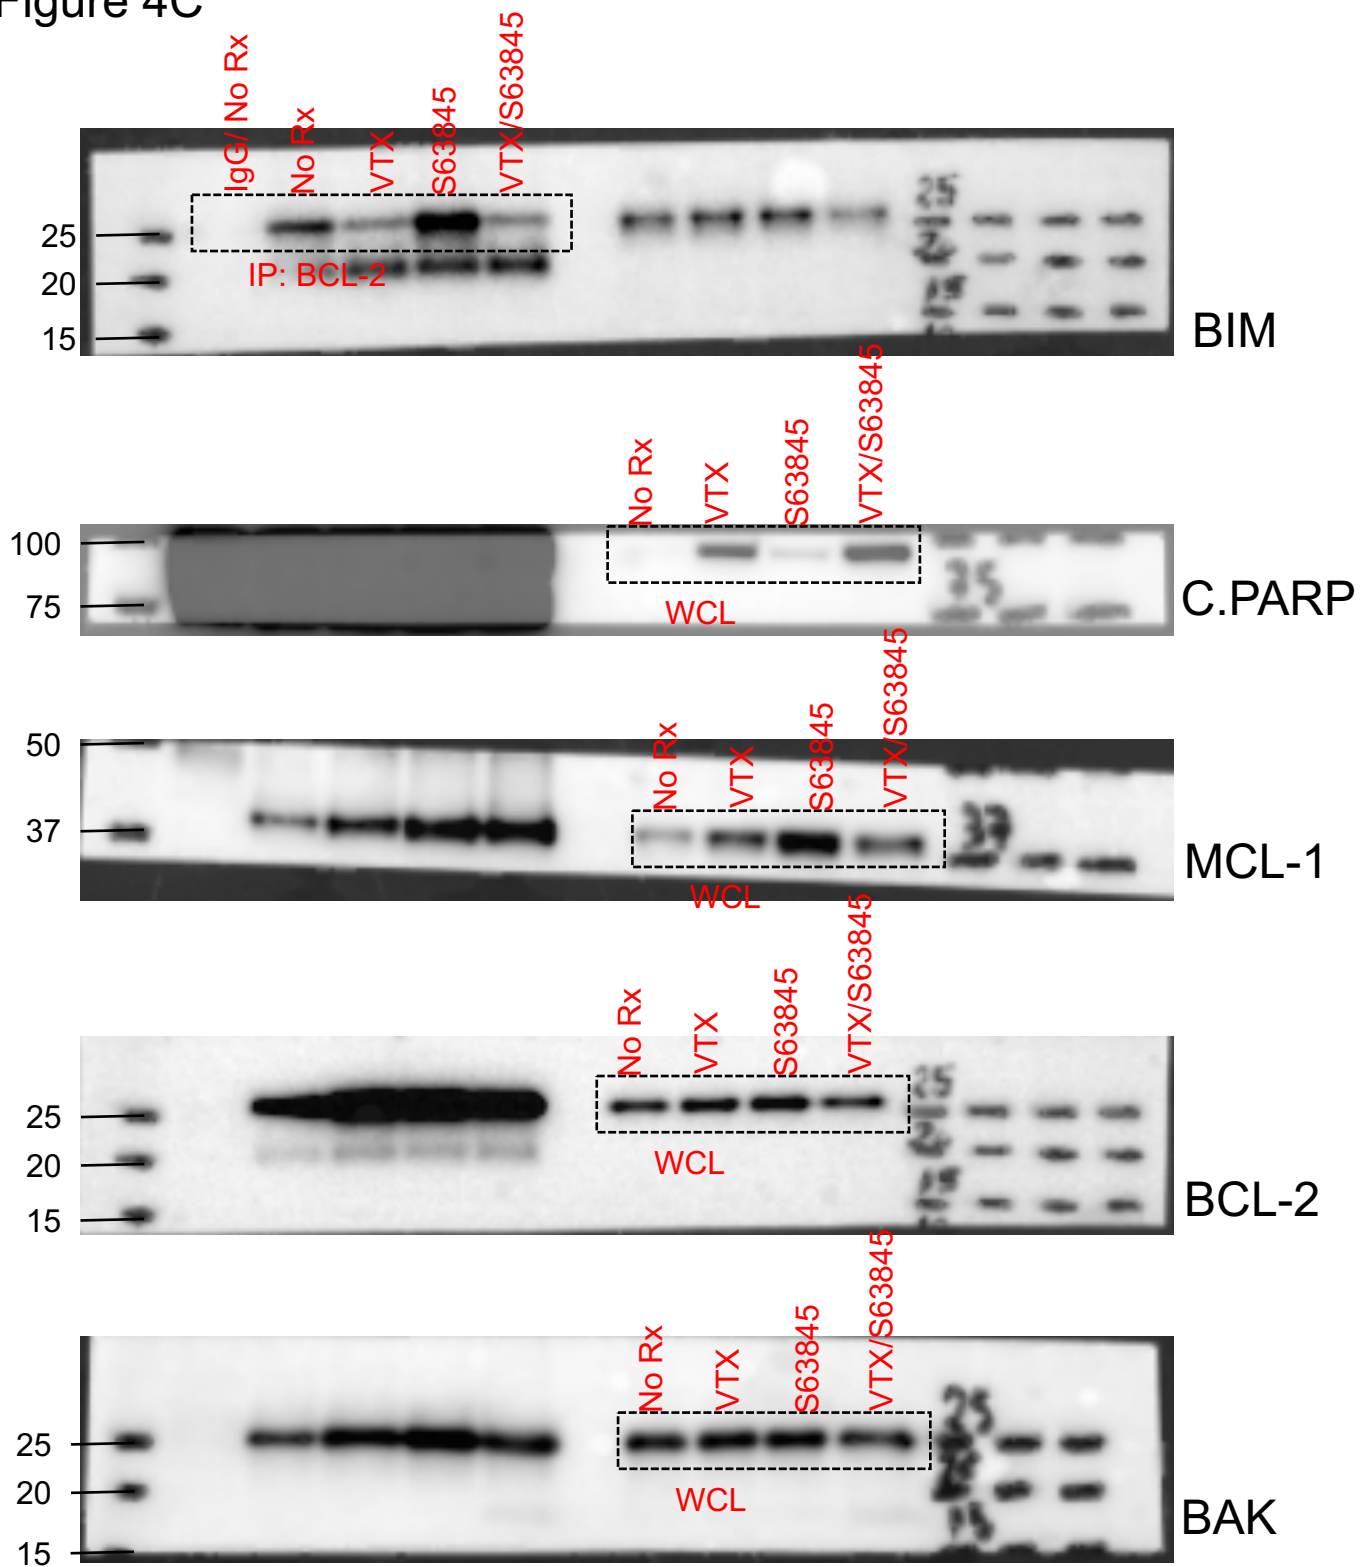

Figure 4C

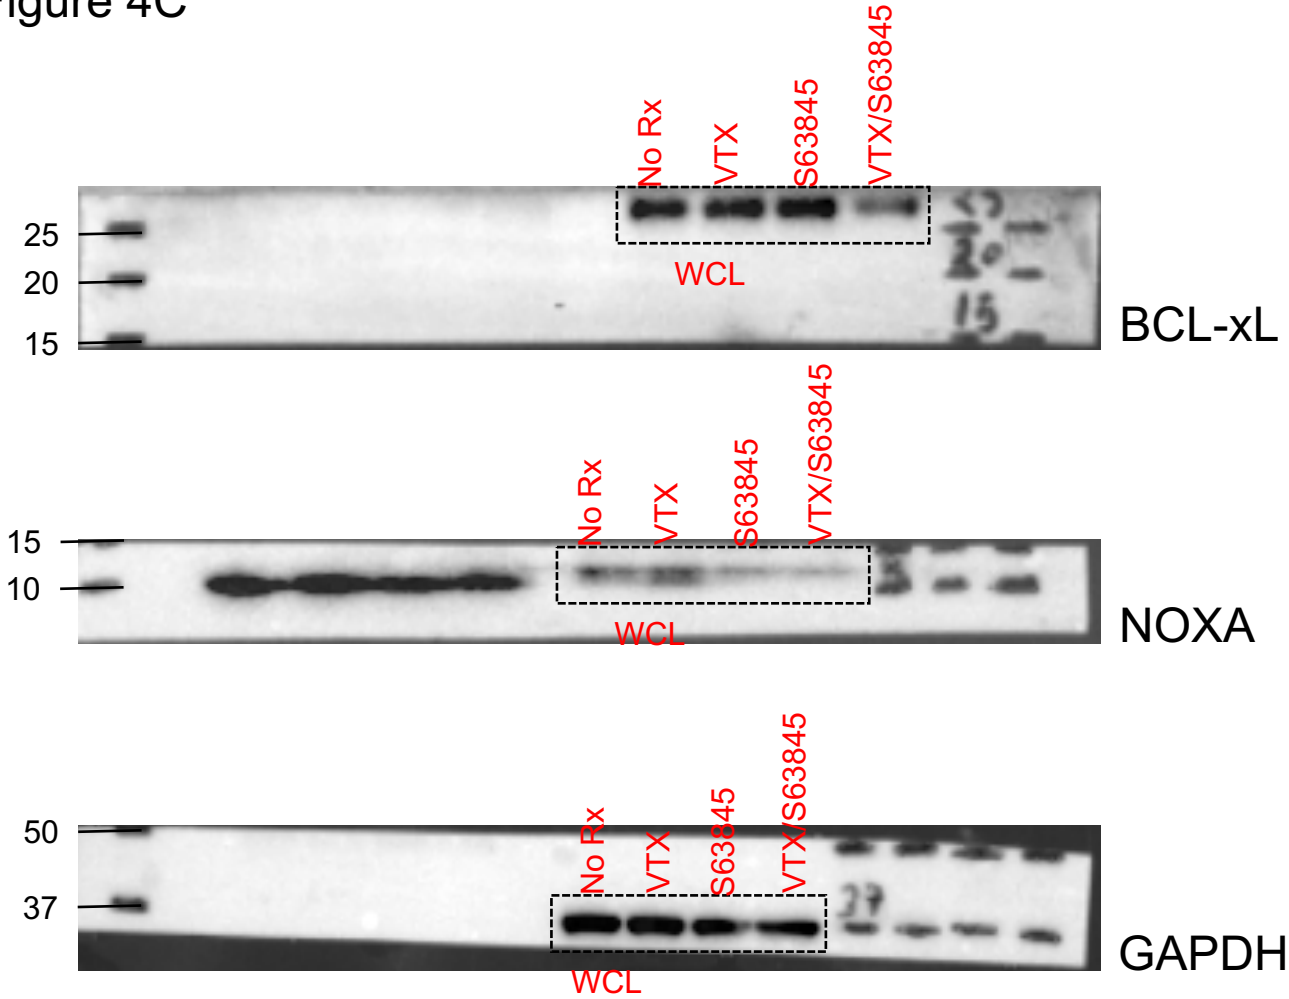

Figure 5C

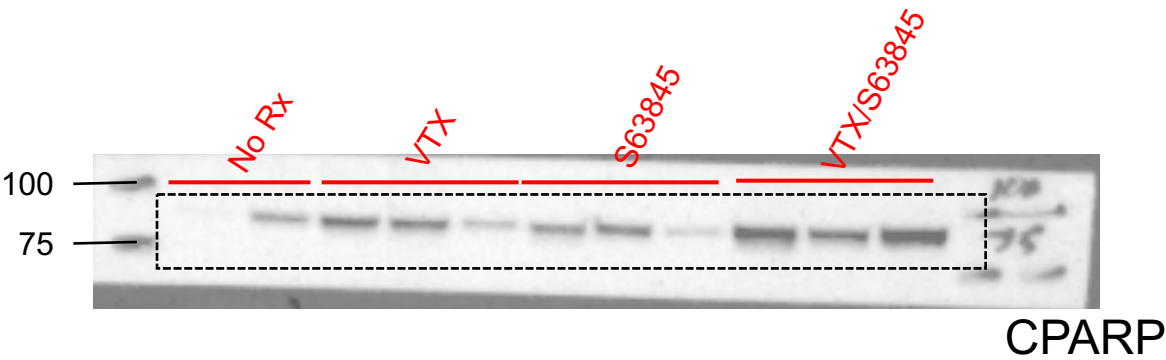

CPARP

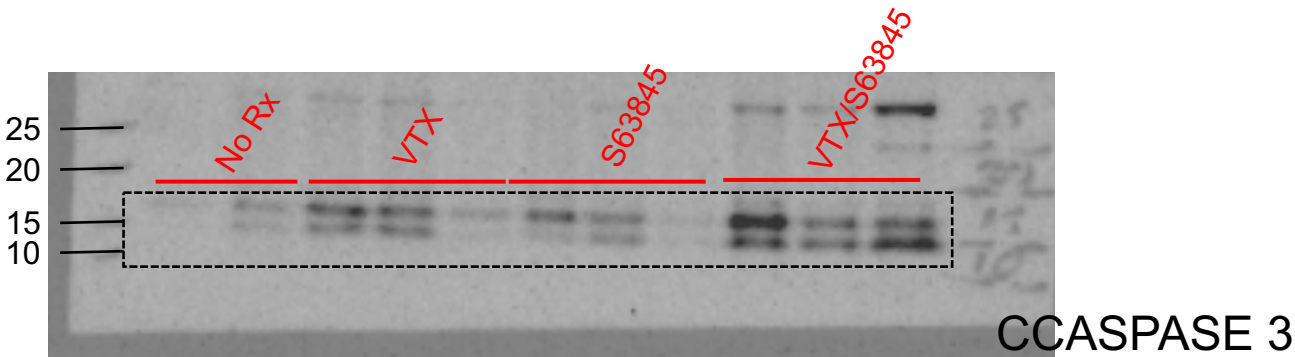

CCASPASE 3

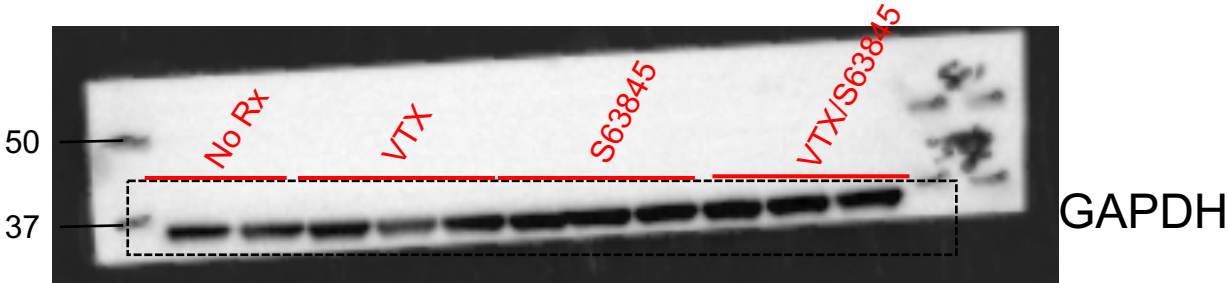

GAPDH

Supplemental Figure 1B

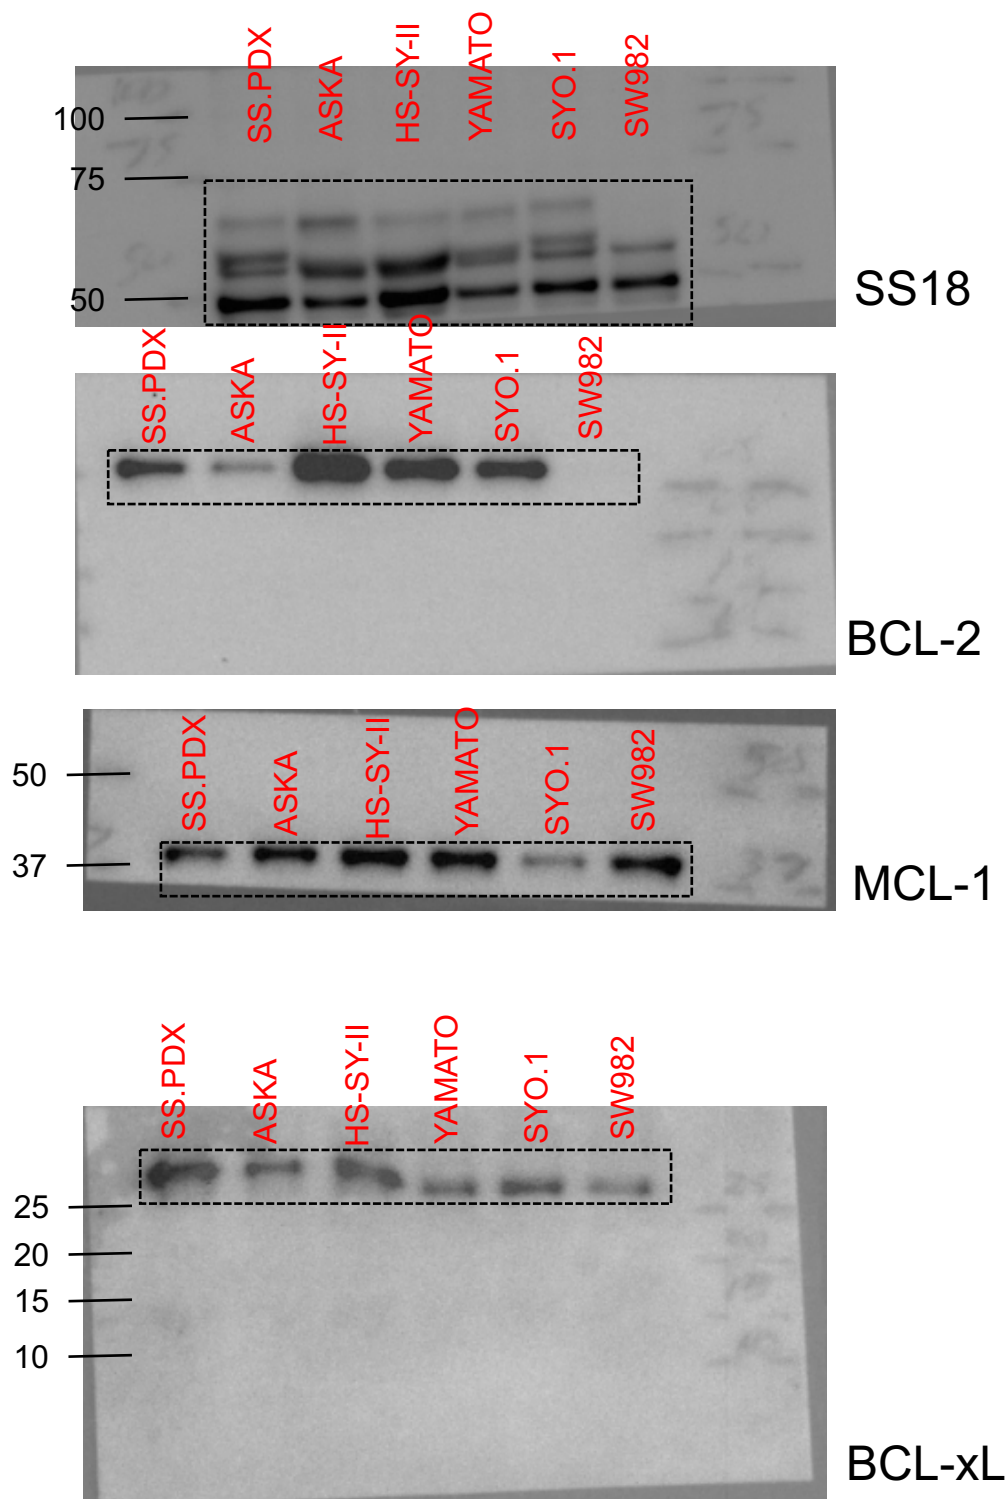



Supplemental Figure 1B

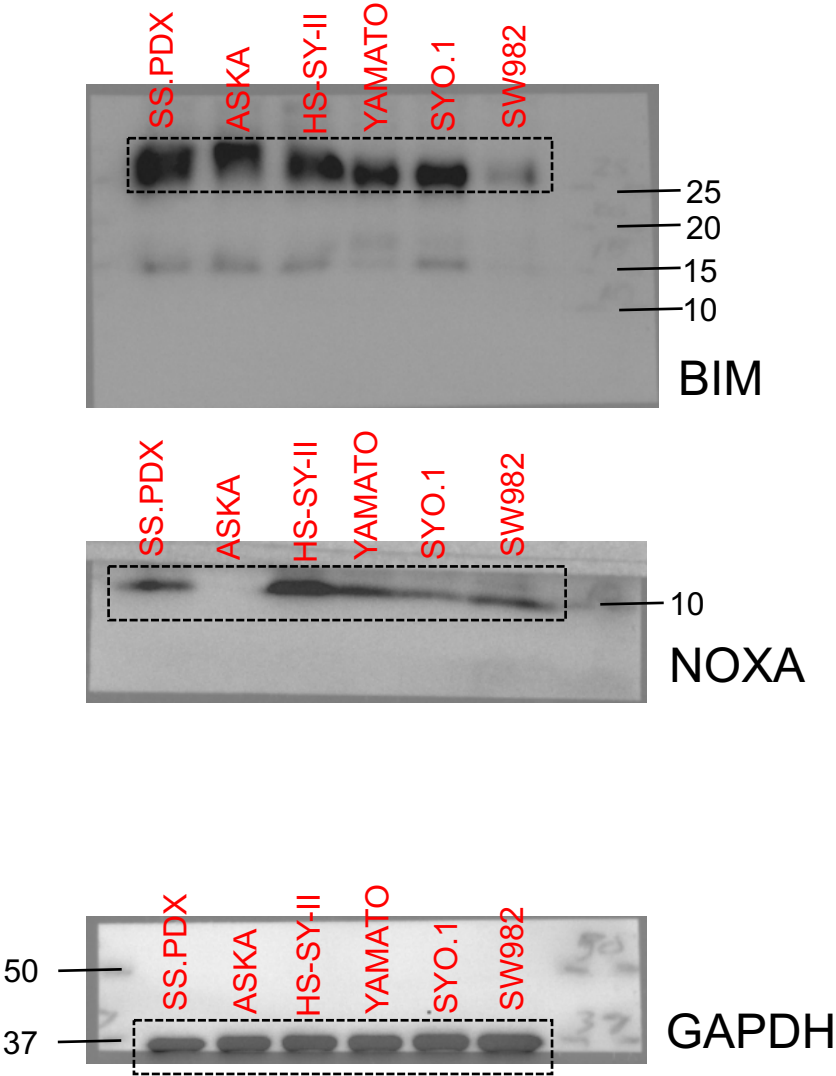

Supplement: s1 [file s1]
