# Supplementary figures and images for: Unmasking BCL-2 Addiction in Synovial Sarcoma by Overcoming Low NOXA
Source: MDPI journal article supplement (doi:10.3390/cancers13102310), 2021-05-12

**A**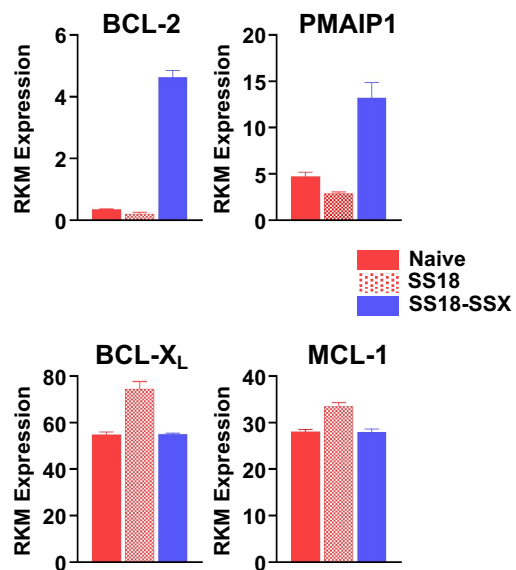**B**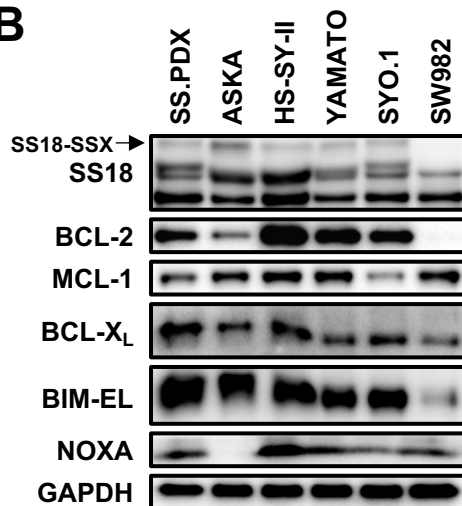

Supplement: s1 [file s1]

**A**

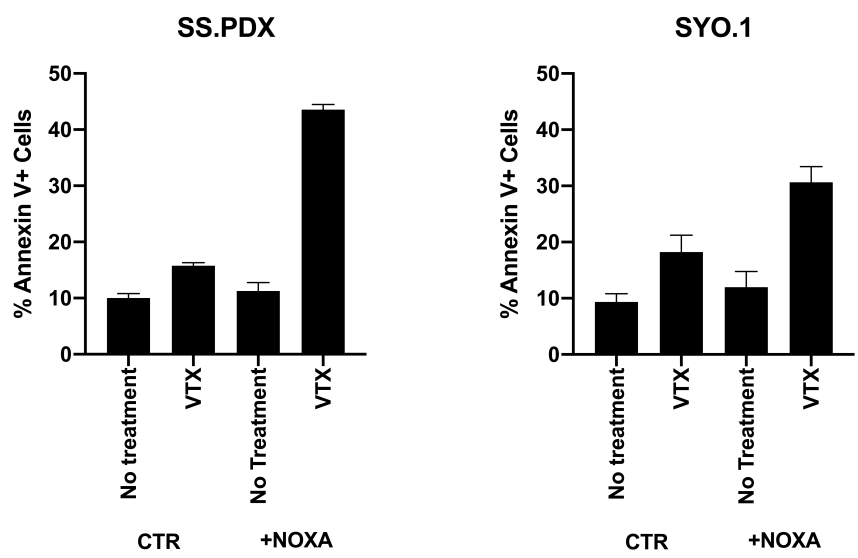

**B**

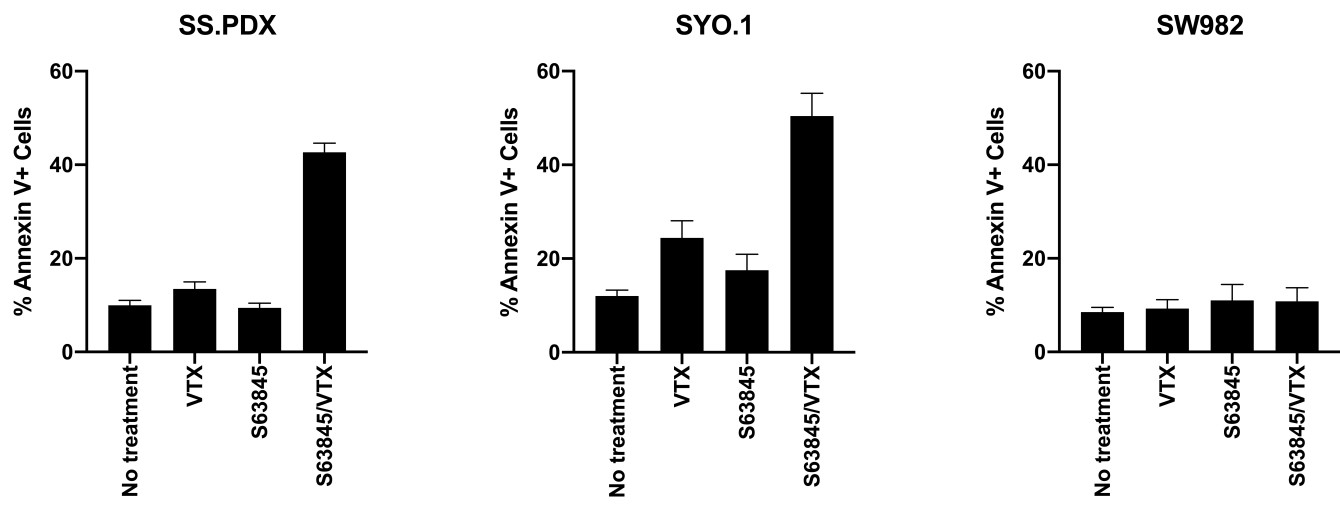

Supplement: s1 [file s1]
